# Supplementary material
Source: HighWire-hosted journal article supplement (https://mh.bmj.com/content/47/1/78)

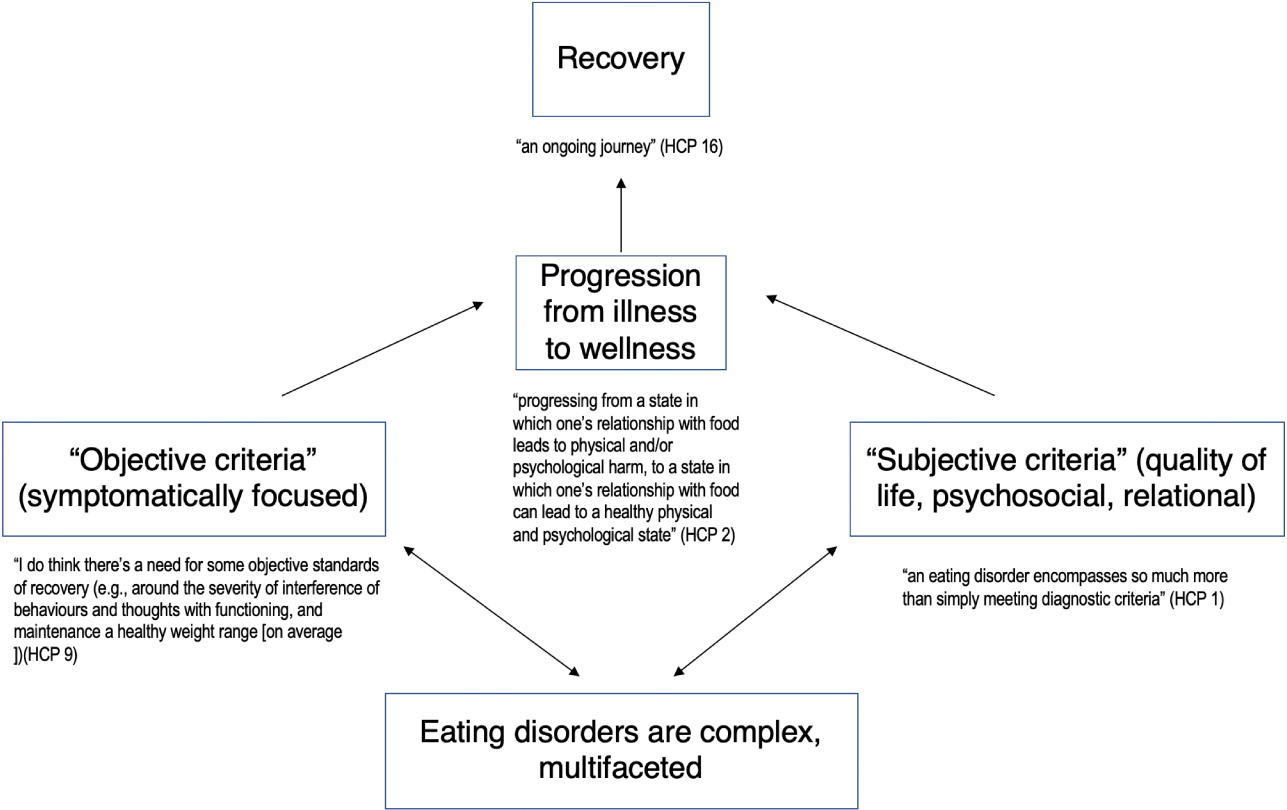

Supplement: inline-supplementary-material-1 [file inline-supplementary-material-1.pdf]

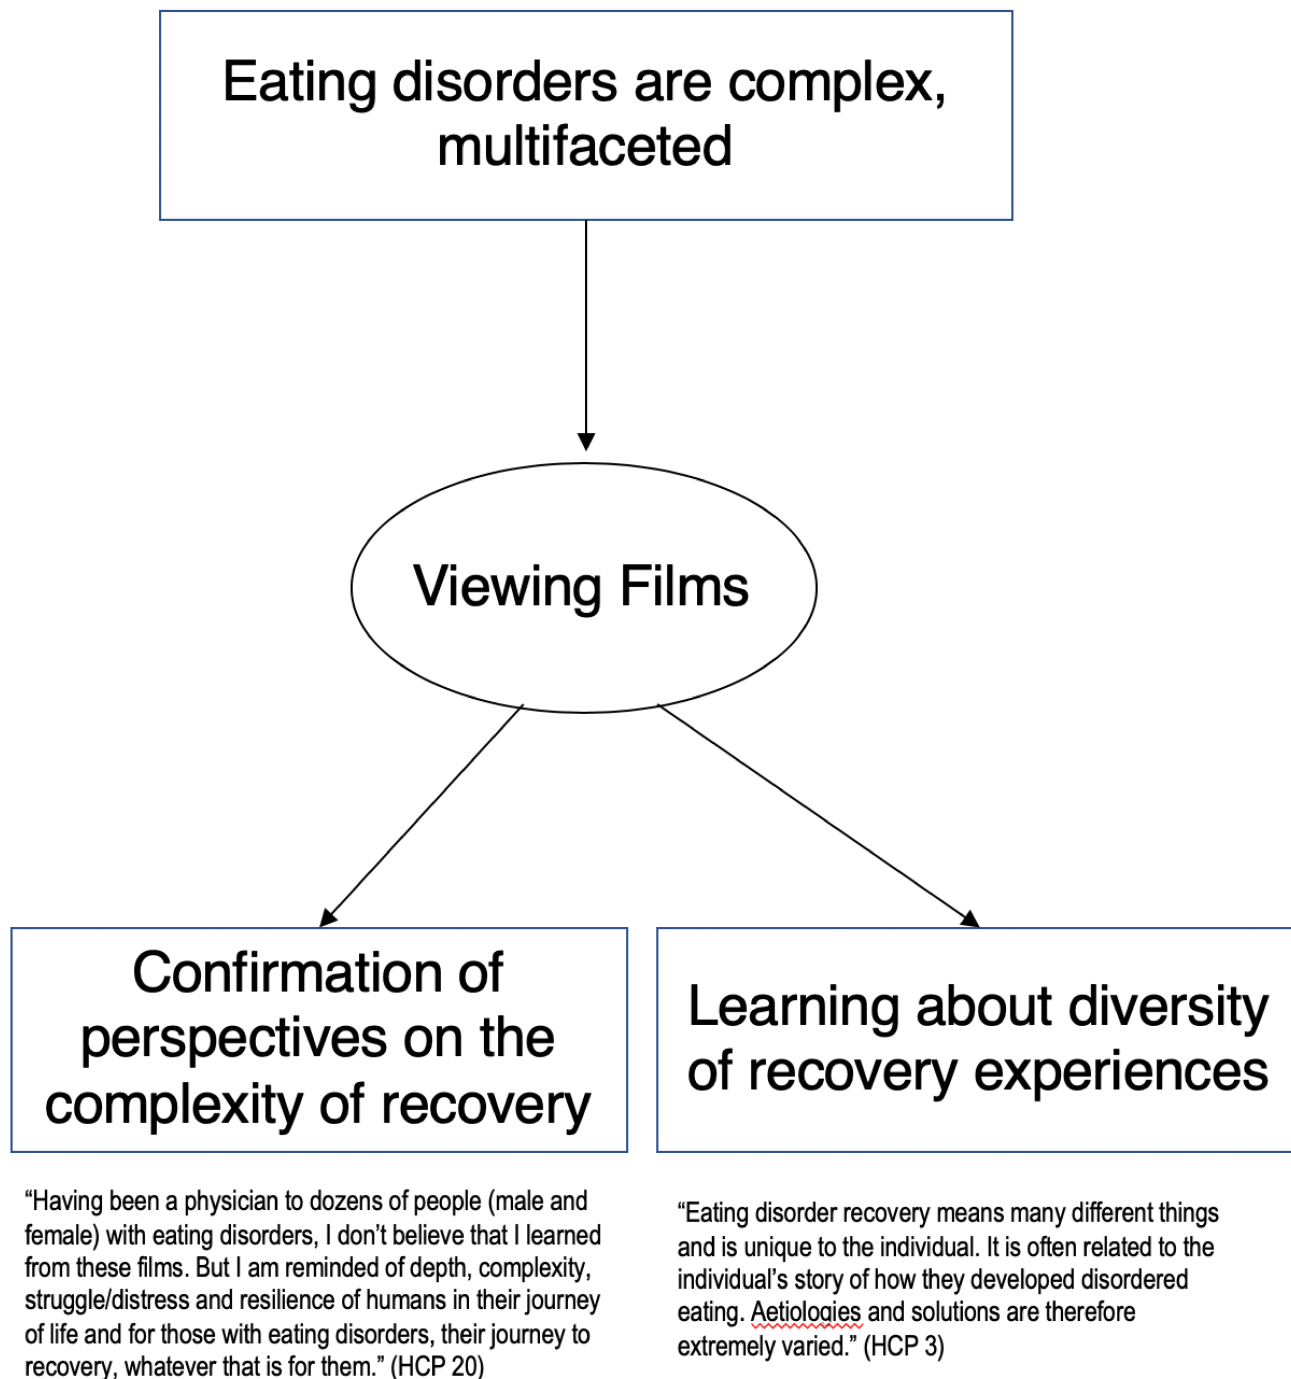

Supplement: inline-supplementary-material-2 [file inline-supplementary-material-2.pdf]

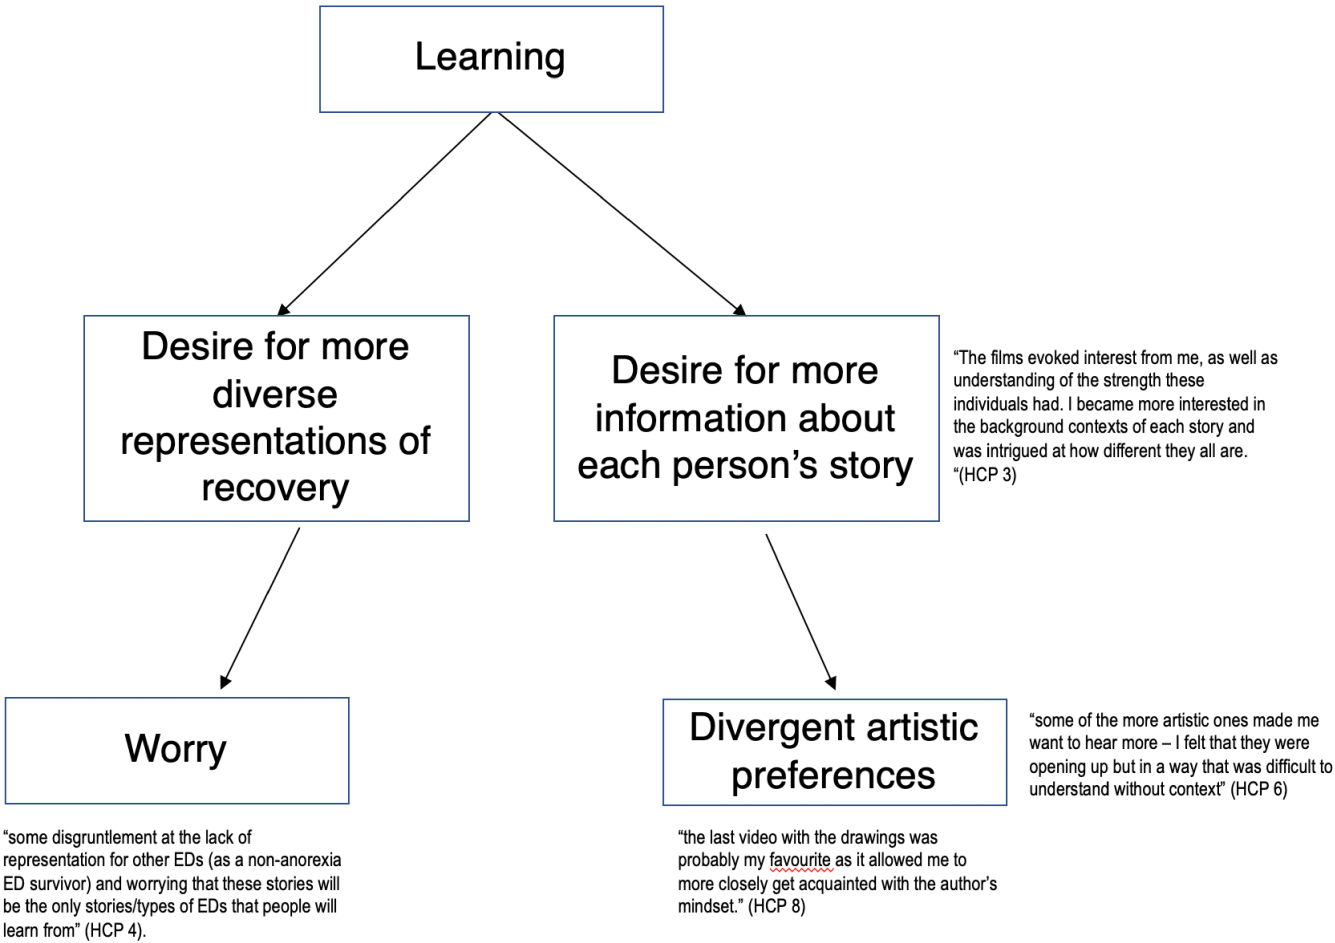

Supplement: inline-supplementary-material-4 [file inline-supplementary-material-4.pdf]
